# 1 **Multifractal signatures of perceptual processing on** 2 **anatomical sleeves of the human body**

3  
4 **Madhur Mangalam<sup>1</sup>, Nicole S. Carver<sup>2</sup> and Damian G. Kelty-Stephen<sup>3</sup>**

5 <sup>1</sup>Department of Physical Therapy, Movement and Rehabilitation Sciences, Northeastern  
6 University, Boston, Massachusetts 02115, USA

7 <sup>2</sup>Department of Psychology, University of Cincinnati, Cincinnati, Ohio 45219, USA

8 <sup>3</sup>Department of Psychology, Grinnell College, Grinnell, Iowa 50112, USA

9  
10 Author for correspondence:

11 Madhur Mangalam

12 e-mail: [m.mangalam@northeastern.edu](mailto:m.mangalam@northeastern.edu)

13 Damian G. Kelty-Stephen

14 e-mail: [keltysda@grinnell.edu](mailto:keltysda@grinnell.edu)

15  
16 **Ethics statement.** This study was approved by the Institutional Review Board (IRB) at the  
17 University of Georgia (Athens, GA).

18 **Data accessibility.** All data analyzed in the present study are available upon request.

19 **Author contributions.** M.M. conceived and designed research; M.M. performed  
20 experiments; M.M., N.S.C. and D.G.K-S. analyzed data; M.M. and D.G.K-S. interpreted  
21 results of experiments; M.M. prepared figures; M.M. and D.G.K-S. drafted manuscript; M.M.,  
22 N.S.C. and D.G.K-S. edited and revised manuscript; M.M., N.S.C. and D.G.K-S. approved  
23 final version of manuscript.

24 **Competing interests.** The authors have no competing interests to declare.

25 **Supplementary materials**

26 **Supplementary Table S1.** Complete output of the full-factorial regression model of Impulse ×  
27 Response × Trial, with Impulse and Response serving as class variables indicating the  
28 locations of the impulse variables and the responding variables, respectively.

29 **Abstract**

30 Research into haptic perception typically concentrates on mechanoreceptors and their  
31 supporting neuronal processes. This focus risks ignoring crucial aspects of active perception.  
32 For instance, bodily movements influence the information available to mechanoreceptors,  
33 entailing that movement facilitates haptic perception. Effortful manual wielding of an object  
34 prompts feedback loops at multiple spatiotemporal scales, rippling outwards from the wielding  
35 hand to the feet, maintaining an upright posture, and interweaving to produce a nonlinear web  
36 of fluctuations throughout the body. Here, we investigated whether and how this bodywide  
37 nonlinearity engenders a flow of multifractal fluctuations that could support perception of  
38 object properties via dynamic touch. Blindfolded participants manually wielded weighted  
39 dowels and reported judgments of heaviness and length. Mechanical fluctuations on the  
40 anatomical sleeves, from hand to the upper body, as well as to the postural center of  
41 pressure, showed evidence of multifractality arising from nonlinear temporal correlations  
42 across scales. The modeling of impulse-response functions obtained from vector  
43 autoregressive (VAR) analysis revealed that distinct sets of pairwise exchanges of multifractal  
44 fluctuations entailed accuracy in heaviness and length judgments. These results suggest that  
45 the accuracy of perception via dynamic touch hinges on specific flowing patterns of  
46 multifractal fluctuations that people wear on their anatomical sleeves.

47 **Keywords:** dynamic touch, effortful touch, fractality, multifractality, postural sway, tensegrity

## 48 **1. Introduction**

### 49 **1.1 Modulating the bodywide flow of mechanical fluctuations to investigate haptic** 50 **perceptual performance**

51 Research into haptic perception typically concentrates on mechanoreceptors and their  
52 supporting neuronal processes, such as mechanoreceptor physiology and neuronal  
53 processing of passive somatosensory feedback [1,2]. Despite the significant insights of this  
54 research, this focus risks ignoring crucial aspects of active perception. For instance, bodily  
55 movements influence the information available to mechanoreceptors, entailing that movement  
56 facilitates haptic perception [3–5]. The present work investigated how bodywide mechanical  
57 interactions facilitate “dynamic” or “effortful” perception of heaviness and length of manually-  
58 wielded, visually-occluded objects. Specifically, we test two possibilities: first, that statistical  
59 structure in mechanical fluctuations flows across disparate anatomical locations (i.e., beyond  
60 the wielding hand) to coordinate perceptual judgments and, second, that the structure of this  
61 flow of statistical regularities impacts the accuracy of these judgments.

### 62 **1.2 The bodywide multifractal tensegrity (MFT) may simplify the degrees-of-freedom** 63 **problem of spatiotemporally organizing afferent activity**

64 The human body is highly complex, consisting of an enormous number of components,  
65 connected, interacting, and evolving via networks spanning multiple space and time scales. In  
66 traditional treatments of nervous-system networks, mechanoreceptor activity specifying the  
67 states of joints, muscles, and tendons flow through the spinal neurons to the brain. The  
68 challenge for this treatment is how the central executive can organize spatiotemporally  
69 distinct afferent signals to infer states of the whole body, segments, and appendages and to  
70 actively generate appropriate efferent signals. This challenge—called the “degrees of  
71 freedom” problem—is only compounded by the ambiguity and context-sensitivity of motor-unit  
72 and mechanoreceptor activity. This problem follows from a crucial premise about how this  
73 network divides its labor, that is, with strictly local processing at the periphery and global  
74 processing reserved for the center.

75 However, besides and cooperating with the central nervous system (CNS), other  
76 bodywide networks supporting perception allow peripheral and central processes to have an  
77 equal share in global coordination. Underneath our skin, a vast network of connective tissues  
78 and extracellular matrix (ECM) has been imagined as a multifractal tensegrity (MFT) in which  
79 the components hang together under tensional and compressional forces at multiple scales.  
80 This balance of tensional and compressional forces might offset local mechanical  
81 disturbances through the global realignment of forces [6–11], producing perceptual  
82 information ranging from coarse to fine [12–14]. If effortful perception is founded on action,  
83 then MFT-like cross-scale interactions proceeding through connective tissue may provide the  
84 biophysical substrate for perception of the body, attachments to the body, and surfaces  
85 adjacent to the body via dynamic touch [15,16]. Such networks support an “ultrafast”  
86 propagation of mechanical perturbations across vast distances called “preflex”, a faster-than-  
87 reflex response based on mechanical tensions rather than neural transmissions [17,18]. The  
88 situation of preflexes in the connective-tissue network’s self-similar, scale-free, fractal  
89 organization may resolve the degrees-of-freedom problem and support the spatiotemporal  
90 organization of afferent activity [15,16].

91 Testing whether bodywide MFT supports dynamic touch requires a specific analytical  
92 framework. Capacity for cross-scale interactions suggests the appearance of fractal  
93 organization that should support perceptual responses [15,19,20]. Indeed, fractal fluctuations

94 of exploratory movements across the body [e.g., in hand, foot, head and postural center of  
95 pressure (henceforth, CoP)] all support the use of available mechanical information for  
96 generating perceptual judgments via dynamic touch [21–26]. The predictive role of fractal  
97 fluctuations appears to even extend across the body. When people manually heft a grasped  
98 object with their hands, the relatively distant measure of postural sway CoP at their feet has a  
99 fractal signature that helps predict the perceptual judgments [27,28]. Hence, fractal  
100 fluctuations provide a window into how specific patterns of movements spread across the  
101 entire body to support perceptual goals that seem—intuitively at least—specifically localized  
102 amidst the anatomical periphery.

### 103 **1.3 Could flow of multifractal fluctuations support perception via dynamic touch?**

104 Effortful manual wielding of an object prompts feedback loops spreading across the  
105 body at multiple spatiotemporal scales, rippling outwards from the wielding hand to the feet,  
106 maintaining an upright posture. These loops do not unfold in parallel at separate scales but  
107 rather interweave and intermix with each other, generating a nonlinear web of fluctuations  
108 throughout the body [23,25,26,29]. These nonlinearities generate multiple fractal forms  
109 following no less from spatial hierarchies of connective-tissue and neural networks than from  
110 the contextual constraints shaping action over time. Fractal fluctuations at any point in the  
111 body might spread through the rest of the body like contagion and this multifractal spread  
112 through the body matters for shaping perceptual judgments. Indeed, the bodywide flow of  
113 fractality indexes the flow of afferent information used to derive perceptual judgments for  
114 manually-hefted, visually-occluded objects, predicting individual differences in perceptual  
115 judgments from individual differences in bodywide flows of fractal fluctuations [30].

116 Hence, the human body is not a single point-mass that can be approximated by one  
117 fractal (i.e., monofractal) form. Instead, the body's many degrees of freedom can each take  
118 on different monofractal forms. Our previous work used causal network modeling via vector  
119 autoregressive (VAR) analysis [31] to model pairwise exchanges of fractal fluctuations across  
120 13 anatomical locations on the body and a handheld object. This approach opened a novel  
121 view of the human body as a multifractal field in which each degree of freedom might carry its  
122 single fractal form and through which individual degrees of freedom can influence others'  
123 monofractal form. So, this portrait of the body is only multifractal in the sense that there are  
124 multiple monofractal forms spread across the body, opening up the capacity for fractal  
125 fluctuations to flow and change across the body.

126 Our previous work of developing a causal network of monofractal fluctuations was the  
127 first step. We now realize that this view was limited: rather than casting the body as a point-  
128 mass of one fractal form, it took a view of the body as a set of point masses, one for each  
129 degree of freedom. This higher-resolution view revealed preliminary insights, but it left the  
130 view of the body still relatively granular and insufficiently fluid; it was multifractal only at the  
131 macroscale of the whole body. If fractal fluctuations “flow” within one degree of freedom  
132 flexibly forcing or absorbing fluctuations on/from another, then the previous examination of  
133 how monofractal forms change across the body could only have been an initial step. Degrees  
134 of freedom are not point masses and may themselves contain finer-grained fluctuations  
135 supporting the bodywide flow.

136 Here, we aim to revisit this notion of a multifractal bodywide network with the  
137 recognition that a single component can itself be multifractal. That is, a single degree of  
138 freedom can exhibit different fractal patterns across time or for different-sized events. For that  
139 matter, perceptual accuracy may depend sooner on the nonlinearity generating multifractal  
140 forms than on nonlinearity generating monofractal forms [24,32–34]. The difference here has

141 to do with the fact that monofractal form is only suggestive of a similar pattern observable at  
142 many scales, and it is mute to the reasons for similarity. Meanwhile, the multifractal form is  
143 explicitly the result of nonlinearities that force interactions across scales and not just  
144 coincidental resemblance of parallel but separate mechanisms [35].

145 The tensegrity proposal rests explicitly on the implication of interactions across scales,  
146 and thus the present multifractal revision of our previously monofractal results is an attempt to  
147 bring the evidence closer into alignment with the theory. The feedback loops in bodywide  
148 nonlinearities noted above reflect as well that feedback loops carry information amongst local  
149 and global scales: for example, local feedback loops unfolding amongst muscles of the hand  
150 both feed on and support more global feedback loops built between hand and legs planted on  
151 the ground. Such local-to-global and global-to-local flow of nonlinearity entails that each  
152 degree of freedom will be shimmering with multifractal form. Our previous work depicted the  
153 body as multifractal in the weak sense of spatially heterogeneous monofractal forms across  
154 the body. It construed the multifractal tensegrity as very many monofractal point masses  
155 bumping up against each other. However, if interactions across scales support perception,  
156 then it is important to elaborate prior work from monofractal analyses to multifractal analysis.  
157 Doing so will allow a more direct test of two points: 1) whether exchanges amongst individual  
158 degrees of freedom deals in fully multifractal fluctuations (i.e., not just spatially different  
159 monofractal fluctuations) and 2) whether the exchanges of multifractal fluctuations amongst  
160 degrees of freedom support the accuracy of perceptual judgments.

161

## 162 **2. Materials and methods**

### 163 **2.1. Participants**

164 Fifteen healthy adults (seven women, *mean*±*s.d.* age = 23.4±3.4 years, all right-  
165 handed [36]) with no muscular, orthopedic, and neurological disorder participated in this study  
166 after providing verbal and written informed consent.

### 167 **2.2. Experimental objects**

168 Each object ( $n = 6$ ) consisted of an oak, hollow aluminum, or solid aluminum dowel  
169 ( $l \times d = 1.2 \times 75.0$  cm;  $m = 68$  g, 109 g, and 266 g, respectively) weighted by 4 or 12 stacked  
170 steel rings ( $h = 0.8$  or 2.4 cm;  $m = 56$  or 168 g;  $d_{\text{inner}} = 1.4$  cm,  $d_{\text{outer}} = 3.4$  cm) attached at 20.0  
171 or 60.0 cm, respectively (table 1, figure 1a). The objects systematically differed in their mass,  
172  $m$  (Object 1 > Object 2, Object 3 > Object 4, Object 5 > Object 6), the static moment,  $\mathbf{M}$   
173 (Object 1 = Object 2 =  $\mathbf{M}_S$  < Object 3 = Object 4 =  $\mathbf{M}_M$  < Object 5 = Object 6 =  $\mathbf{M}_L$ ), and the  
174 moment of inertia,  $I_1$  and  $I_3$ , reflecting the resistance of the object to rotation about the  
175 longitudinal axis ( $I_1$  values: Object 1, Object 2, Object 3 < Object 4, Object 5 < Object 6). A  
176 cotton tape of negligible mass was enfolded on each dowel to prevent the cutaneous  
177 perception of its composition.

178 \*\*\*\*\*

179 Insert table 1 & figure 1

180 \*\*\*\*\*

### 181 **2.3. Experimental setup and procedure**

182 Each blindfolded participant stood on a pair of force plates (60×40 cm; Bertec Inc.,  
183 Columbus, OH), wielded each object and reported judgments of heaviness and length (figure  
184 1b). To impose constraints on haptic exploration, each participant moved his/her wrist about

185 10° ulnar deviation, the neutral position, or 10° radial deviation (figure 1c). In a static  
186 condition, the participant lifted and held each object static. In two dynamic conditions, the  
187 participant lifted and wielded each object synchronously with metronome beats at 2 Hz or 3  
188 Hz, which added additional constraints on perceptual exploration. Each participant was  
189 instructed to minimize torso and upper-hand motion and the amplitude of wielding.

190 3D motion of three reflective markers ( $d = 9.5$  mm) attached on each object at 30, 45,  
191 and 60 cm and nine reflective markers attached on the participant's body (table 2, figure 2a)  
192 was tracked at 100 Hz using an eight-camera Qualisys motion-tracking system (Qualisys Inc.,  
193 Boston, MA).

194 \*\*\*\*\*

195 Insert table 2 & figure 2

196 \*\*\*\*\*

197 Each participant completed 108 trials (3 Wrist angles  $\times$  3 Wrist angular kinematics  $\times$  6  
198 Objects  $\times$  2 Trials/Object). Each factor of Wrist angle (Radial, Neutral and Ulnar) was crossed  
199 with each factor of Wrist angular kinematics (Static, 2 Hz dynamic and 3 Hz dynamic). The  
200 order of the 12 trials (6 Objects  $\times$  2 Trials/Object) was pseudo-randomized for each block.  
201 Before the first and after every six trials, each participant wielded a reference object that was  
202 arbitrarily attributed to a heaviness value of 100 units. In each trial, after a "lift" signal, the  
203 participant lifted the object by about 5 cm and held it static or wielded it at 2 Hz or 3 Hz. After  
204 5 s, following a "stop" signal, the participant placed the object back and reported (a) perceived  
205 heaviness proportionally higher and lower than 100 to an object perceived heavier and lighter,  
206 respectively, than the reference object; and (b) perceived length by adjusting the position of a  
207 marker on a string-pulley assembly.

## 208 **2.4. Data processing**

### 209 **2.4.1. CoP planar Euclidean displacement (PED) series**

210 Force plate output was downsampled by 1/20 (i.e., from 2000 Hz to 100 Hz) to match  
211 motion-tracking sampling rates. The ground reaction forces recorded at each trial yielded a  
212 two-dimensional CoP series of 500 samples, describing the position of the CoP along the  
213 participant's medial-lateral and anterior-posterior axes. A one-dimensional CoP planar  
214 Euclidean displacement (PED) series of 499 samples was obtained for each downsampled  
215 CoP series, describing CoP displacement along the transverse plane of the body (figure 2b).

### 216 **2.4.2. Sway spatial Euclidean displacement (SED) series**

217 Motion tracking of each reflective marker ( $n = 12$ ) yielded a three-dimensional  
218 kinematic series of 500 samples, describing its position along the participant's medial-lateral,  
219 anterior-posterior and superior-inferior axes. A one-dimensional spatial Euclidean  
220 displacement (SED) series of 499 samples was obtained for each marker describing the  
221 displacement of that marker in 3D (figure 2b).

## 222 **2.5. Assessing multifractality and interactivity**

### 223 **2.5.1. Direct estimation of multifractal spectrums**

224 Chhabra and Jensen's direct method estimated multifractal spectrums of CoP PED and  
225 sway SED series [37]. This method samples series  $u(t)$  at progressively larger scales such  
226 that the proportion of signal  $P_i(L)$  falling within the  $i^{\text{th}}$  bin of scale  $L$  is

$$227 \quad P_i(L) = \frac{\sum_{k=|i-1|L+1}^{iL} u(k)}{\sum u(t)} \quad (1)$$

228 As  $L$  increases,  $P_i(L)$  represents progressively larger proportion of  $u(t)$ ,

$$229 \quad P(L) \propto L^\alpha \quad (2)$$

230 suggesting growth of proportion according to one “singularity” strength  $\alpha$  [38].  $P(L)$  exhibits  
231 multifractal dynamics when it grows heterogeneously across time scales  $L$  according to  
232 multiple singularity strengths, such that

$$233 \quad P_i(L) \propto L^{\alpha_i} \quad (3)$$

234 whereby each  $i^{\text{th}}$  bin may show a distinct relationship of  $P(L)$  with  $L$ . The width of this  
235 singularity spectrum,  $\Delta\alpha(\alpha_{\max} - \alpha_{\min})$ , indicates the heterogeneity of these relationships [39,40].

236 Chhabra and Jensen’s method [37] estimates  $P(L)$  for  $N_L$  nonoverlapping bins of  $L$ -  
237 sizes and transforms them into a “mass”  $\mu$  using a  $q$  parameter emphasizing higher or lower  
238  $P(L)$  for  $q > 1$  and  $q < 1$ , respectively, as follows

$$239 \quad \mu_i(q, L) = \frac{[P_i(L)]^q}{\sum_{i=1}^{N_i} [P_i(L)]^q} \quad (4)$$

240  $\alpha(q)$  is the singularity for mass  $\mu(q)$ -weighted  $P(L)$  estimated by

$$241 \quad \alpha(q) = - \lim_{L \rightarrow \infty} \frac{1}{\ln L} \sum_{i=1}^N \mu_i(q, L) \ln P_i(L)$$

$$242 \quad \dot{\lim}_{L \rightarrow 0} \frac{1}{\ln L} \sum_{i=1}^N \mu_i(q, L) \ln P_i(L). \quad (5)$$

243 Each estimated value of  $\alpha(q)$  belongs to the singularity spectrum only when the Shannon  
244 entropy of  $\mu(q, L)$  scales with  $L$  according to the Hausdorff dimension  $f(q)$ , where

$$245 \quad f(q) = - \lim_{L \rightarrow \infty} \frac{1}{\ln L} \sum_{i=1}^N \mu_i(q, L) \ln \mu_i(q, L)$$

$$246 \quad \dot{\lim}_{L \rightarrow 0} \frac{1}{\ln L} \sum_{i=1}^N \mu_i(q, L) \ln \mu_i(q, L). \quad (6)$$

247 For values of  $q$  yielding a strong relationship between Eqs. (5 & 6)—in this study, exhibited a  
248 correlation coefficient,  $r > 0.9$ , the parametric curve  $(\alpha(q), f(q))$  or  $(\alpha, f(\alpha))$  constitutes the  
249 singularity spectrum. The singularity spectrum width,  $\Delta\alpha = \alpha_{\max} - \alpha_{\min}$ , was calculated for each  
250 CoP PED and sway SED series (figure 2c).

### 251 2.5.2. Surrogate testing

252 To identify whether nonzero  $\Delta\alpha$  reflected nonlinear temporal correlations [41,42],  $\Delta\alpha$  of  
253 each original series was compared to  $\Delta\alpha$  of surrogate series using Iterated Amplitude  
254 Adjusted Fourier Transformation (IAAFT) [43,44]. IAAFT randomizes original values time-  
255 symmetrically around the autoregressive structure. It thus generates surrogates that  
256 randomize phase ordering of the series’ spectral amplitudes while preserving only linear

257 temporal correlations. If the original  $\Delta\alpha$  exceeds a 95% confidence interval (CI) of  $\Delta\alpha$  for 32  
258 IAAFT series (i.e.,  $p < 0.05$ ), then the original time series has nonzero nonlinear correlations  
259 quantifiable using the one-sample t-statistic (henceforth,  $t_{MF}$ ) comparing  $\Delta\alpha$  for the original  
260 series to that for the surrogates.

## 261 **2.6. Vector autoregression (VAR) analysis**

262 Vector autoregression (VAR) captures linear interdependencies amongst concurrent  
263 series. We used VAR to model the effects of trial-by-trial  $\Delta\alpha$  from each marker position to  
264 each other marker position across trials in the study. VAR describes each variable based on  
265 its own lagged value and that of each other variable, along with an error term. Unlike  
266 structural models, VAR modeling does not use any prior knowledge besides a list of variables  
267 that can be hypothesized to affect each other temporally. Thus, VAR analysis allows for  
268 exploring causal relationships after addressing minimal short-lag relationships [45].

269 VAR produces a system of  $m$  regression equations predicting each variable as a  
270 function of lagged values of itself and of each other variable. In the simplest case of  $m=2$ ,  
271 with time series  $f(t)$  and  $g(t)$  definable at each value of time  $t=1$  to  $t=N$ , the structure of a  
272 VAR model is:

$$273 f(t) = A_1 \cdot f_{t-1} + B_2 \cdot g_{t-1} + \dot{C}_f \cdot h + \varepsilon_f \dot{C}_f,$$

$$274 g(t) = B_1 \cdot g_{t-1} + A_2 \cdot f_{t-1} + \dot{C}_g \cdot h + \varepsilon_g \dot{C}_g,$$

275 where  $A_j$  and  $B_j$  quantify the effects of the previous values of  $f$  and  $g$ , respectively, with  $j$   
276 indexing the variable to which these previous values contribute, with error terms  $\varepsilon_f$  and  $\varepsilon_g$  [46].  
277 The above equations describe a 1-lag VAR. Each  $f$  and  $g$  is described in terms of values up  
278 to 1 value preceding the predicted values. VAR models can include exogenous variables,  
279 such as the factors of experimental design which stand outside the relationships amongst the  
280 variables internal to the system. In the above example, the time series  $h(t)$  can induce  
281 changes in  $f(t)$  or  $g(t)$ , but changes in neither  $f(t)$  or  $g(t)$  can induce changes in  $h(t)$ .  $h$  is an  
282 exogenous variable, and  $C_f$  and  $C_g$  are quantify the effects of  $h(t)$  on  $f(t)$  and  $g(t)$ ,  
283 respectively. Endogenous variables are variables internal to the system (i.e.,  $f(t)$  or  $g(t)$ ) which  
284 may respond to and induce changes in other endogenous variables. For the present analysis,  
285  $\Delta\alpha$  of CoP PED and sway SED series served as an endogenous variable (figure 2d).

286 VAR models forecast the effects of endogenous variables through impulse-response  
287 functions (IRFs). As opposed to standard regression, which can only evaluate the relationship  
288 between  $f(t)$  and  $g(t)$ , IRFs can evaluate the relationship between  $f(t)$  and  $g(t+\tau)$ , or between  
289  $g(t)$  and  $f(t+\tau)$ , where  $\tau$  is a whole number. First, orthogonalizing the regression equations  
290 and, second, inducing an “impulse” to the system of regression equations by adding 1 s.e.m.  
291 to any single variable, propagating responses across variables. The plot of an IRF describes  
292 how an impulse in one time series changes the later predicted values in a different time series  
293 [46,47]. It is customary to fit the least number of lags that leave independently and identically  
294 distributed residuals.

## 295 **2.7. Statistical analysis**

296 All pairwise impulse-response relationships indicated the effects of increases in  $\Delta\alpha$   
297 across subsequent trials. A full-factorial regression model [48] of Impulse  $\times$  Response  $\times$  Trial  
298 tested the average effects and responses of each marker position along with orthogonal  
299 linear, quadratic, and cubic polynomials of Trial, using the “nlme” package for RStudio [49].



300 Impulse and Response served as class variables indicating the locations of the impulse  
301 variables and the responding variables, respectively.

302 Regression models of unsigned error, for example,  $absolute(H/L_{perceived} - H/L_{actual})$ ,  
303 tested the effects of significant impulse-response relationships between marker positions.  
304 Unsigned error for  $L_{perceived}$  was the absolute value of  $L_{perceived}$  minus actual length (i.e., 75 cm).  
305 Because  $H_{perceived}$  was calculated as a percentage rating relative to a 109-g reference object,  
306  $H_{error}$  was calculated as the absolute value of  $[H_{actual} \times (H_{perceived} \times 109) / 100 - 100]$  rounded to the  
307 nearest whole-number percentage. For instance, perceiving the heaviness of 236-g Object 2  
308 as 120% entails unsigned error  $H_{error} = absolute(100 \times [236 \times (120 \times 109) / 100] / 236 - 100) = 45$ .  
309 Because  $L_{error}$  was linear (i.e., additive) and  $H_{error}$  was nonlinear (i.e., a rate), they were  
310 modeled using linear mixed-effect (LME) and mixed-effect Poisson regression, using “nlme”  
311 and “lme4” packages for Rstudio, respectively [49,50].

312 Predictors of unsigned error included Wrist angle, Object’s logarithmic moments of  
313 inertia ( $LogI_1$  and  $LogI_3$ ), trial order,  $\Delta\alpha$  of CoP ( $CoP_{\Delta\alpha}$ ), and the IRF values forecasting the  
314 first significant response to impulse over subsequent trials for OBJD->RFIN, OBJD->RELB,  
315 OBJD->RUPA, RWRA->RELB, RFIN->RUPA, RELB->RWRA, RELB->RUPA, RELB->RSHO,  
316 RUPA->CLAV, CoP->RWRA and RFRM->CoP.  $LogI_3$  and trial order improved model fit only for  
317  $H_{error}$  and  $L_{error}$ , respectively.

318

### 319 3. Results

#### 320 3.1. Fluctuations at each anatomical location exhibits multifractality

321 All original CoP PED and sway SED series exhibited non-zero singularity-spectrum  
322 widths (i.e.,  $\Delta\alpha > 0$ ; range of  $\Delta\alpha$ : CoP: 0.0085–0.48; OBJT: 0.026–0.85; OBJD: 0.029–0.80;  
323 OBJP: 0.017–0.64; RFIN: 0.028–0.90; RWRA: 0.036–0.85; RWRB: 0.023–0.85; RFRM:  
324 0.015–1.16; RELB: 0.028–1.41; RUPA: 0.033–1.81; RSHO: 0.024–2.09; CLAV: 0.033–1.89;  
325 STRN: 0.033–1.80).  $\Delta\alpha$  was wider for 1412 of 1620 CoP PED series, as well as for each  
326 original sway SED series than the corresponding IAAFT surrogates (figure 3).

327 \*\*\*\*\*

328 Insert figure 3

329 \*\*\*\*\*

#### 330 3.2. Multifractal fluctuations flow across the body

331 First, the IRFs showed pairwise exchanges of multifractality following the sequence of  
332 motor segments from a handheld object (OBJD) to the shoulder (RSHO; figure 4). The  
333 strongest effects included multifractality-promoting effects from the object (OBJD) on the most  
334 distal arm segments that become progressively smaller (from RFIN to RWRA to RFRM) and  
335 then multifractality-diminishing effects on the proximal arm segments (RELB, RUPA and  
336 RSHO). Hence, the local contacts with objects at hand have intuitive effects on the chain of  
337 motor degrees of freedom, with multifractal fluctuations decaying as they propagate from  
338 peripheral to central components. [The regression modeling confirmed that the individual  
339 mean differences from zero are significant (Supplementary Table S1).]

340 \*\*\*\*\*

341 Insert figure 4

342 \*\*\*\*\*

343 Collectively, the IRF results suggest functional segregation of forearm from upper arm  
344 in how each mediated exchanges of multifractal fluctuations. The forearm sent multifractal  
345 fluctuations outward to the object, indicating that forearm and object promote each other's  
346 multifractality. This mutual object-forearm promotion of multifractality came at the expense of  
347 upper-arm multifractality. Perhaps the forearm draws multifractality away from the upper arm  
348 to send downstream to the object. Certainly, increases in RFRM and RFIN multifractality  
349 decreased later RELB and RUPA multifractality, respectively. Conversely, increases in RUPA  
350 and RELB multifractality decreased later OBJD multifractality, with increases in RUPA also  
351 contributing to decreases in multifractality at OBJD.

352 The joints played intermediating roles between forearm-like multifractality-promoting  
353 and upper-arm-like multifractality-limiting tendencies. Exemplifying the former, OBJD and  
354 RELB multifractality decreased when the other increased, and increases in RELB  
355 multifractality prompted increases in multifractality across the upper arm (RUPA and RSHO).  
356 Exemplifying the latter, RELB and RWRA showed mutual positive effects on each other's  
357 multifractality as though RELB might participate in the forearm's support of multifractality.  
358 Similar to RELB, RSHO showed the upper arm's inverse relationship to increases in OBJD  
359 multifractality and increased with RUPA multifractality in response to RELB multifractality. But  
360 RSHO also showed a multifractality-promoting aspect: increases in RSHO multifractality  
361 prompted later increases in OBJD and RWRA multifractality.

362 The IRF effects extended beyond the upper body to include CoP. Increases in CoP  
363 multifractality showed a positive effect on later RWRA and RFRM multifractality.

### 364 **3.3. The flow of multifractal fluctuations across the body influences perceptual** 365 **accuracy**

366 The flow of multifractal fluctuations differed across individuals and predicted individual  
367 differences in accuracy.  $H_{\text{error}}$  depended on seven pairwise exchanges of multifractal  
368 fluctuations in supporting perceptual accuracy (table 3). The GLM returned positive  
369 coefficients for IR effects of OBJD on RFIN ( $b \pm s.e.m. = 10.54 \pm 1.99$ ,  $p < 0.001$ ), OBJD on  
370 RUPA ( $b \pm s.e.m. = 12.56 \pm 3.68$ ,  $p < 0.001$ ), RFIN on RUPA ( $b \pm s.e.m. = 20.75 \pm 6.42$ ,  $p = 0.001$ ),  
371 RELB on RUPA ( $b \pm s.e.m. = 15.36 \pm 5.62$ ,  $p = 0.006$ ) and RUPA on CLAV ( $b \pm s.e.m. =$   
372  $10.10 \pm 4.61$ ,  $p = 0.028$ ). It returned negative coefficients for IR effects of OBJD on RELB  
373 ( $b \pm s.e.m. = -10.07 \pm 3.65$ ,  $p = 0.006$ ) and CoP on RWRA ( $b \pm s.e.m. = -51.54 \pm 11.51$ ,  $p <$   
374  $0.001$ ). The negative IR effects of OBJD on RELB and CoP on RWRA entailed that these  
375 pairwise exchanges of multifractal fluctuations entailed decreases in  $H_{\text{error}}$ ; all other IR effects  
376 entailed increases in  $H_{\text{error}}$  (figure 5, left panels). These effects held above and beyond the  
377 significant effects of wrist angle variations, and of the logarithmic first and third moments of  
378 inertia (table 3). Also,  $\text{CoP}_{\Delta\alpha}$  showed a positive effect on  $H_{\text{error}}$  ( $b \pm s.e.m. = 0.59 \pm 0.14$ ,  $p <$   
379  $0.001$ ), suggesting that greater  $\Delta\alpha$  led to less accurate heaviness judgments, as shown  
380 previously [28].

381 \*\*\*\*\*

382 Insert table 3 & figure 5

383 \*\*\*\*\*

384  $L_{\text{error}}$  depended on seven pairwise exchanges of multifractal fluctuations in supporting  
385 perceptual accuracy. The LME returned positive coefficients for IR effects of OBJD on RUPA  
386 ( $b \pm s.e.m. = 634.85 \pm 262.92$ ,  $p = 0.047$ ), RWRA on RELB ( $b \pm s.e.m. = 372.31 \pm 156.11$ ,  $p =$   
387  $0.049$ ), RELB on RUPA ( $b \pm s.e.m. = 5399.79 \pm 1023.95$ ,  $p = 0.001$ ) and RFRM to CoP  
388 ( $b \pm s.e.m. = 479.31 \pm 147.32$ ,  $p = 0.008$ ). It returned negative coefficients for IR effects RELB

389 on RWRA ( $b \pm s.e.m. = -973.84 \pm 262.91$ ,  $p = 0.008$ ), RELB on RSHO ( $b \pm s.e.m. = -$   
390  $8205.37 \pm 1338.61$ ,  $p < 0.001$ ) and RUPA on CLAV ( $b \pm s.e.m. = -694.50 \pm 174.47$ ,  $p = 0.005$ ).  
391 Thus,  $L_{error}$  decreased with the transfer of multifractal fluctuations from RELB to RWRA, RELB  
392 to RSHO and RUPA to CLAV, and  $L_{error}$  increased with the transfer of multifractal fluctuations  
393 from OBJD to RUPA, RWRA to RELB, RELBV to RUPA and RFRM to CoP (figure 5, right  
394 panels). These effects held above and beyond significant effects of wrist angle variations and  
395 of the logarithmic first moment of inertia (table 3).

396

#### 397 **4. Discussion**

398 We investigated whether and how the flow of multifractal fluctuations entailed in the  
399 bodywide MFT supports perception via dynamic touch. We expected that if perception via  
400 dynamic touch occasions an upstream flow of information from the point of distal stimulation  
401 (i.e., the hand), which sources multifractality from the global dynamics, then not only should  
402 multifractality at hand affect multifractality at the lower and upper arms (i.e., reflecting  
403 upstream effects of distal hand activity) but also multifractality in CoP should promote  
404 multifractality at hand (i.e., posture is at the forefront of multifractality resources for the distal  
405 body parts). Our findings support this hypothesis.

406 The observed multifractality was due to nonlinear interactions across scales reflecting  
407 feedback loops proceeding locally, globally, and interacting across the scales. The impulse-  
408 response forecasting obtained from VAR analysis revealed upstream effects of the distal hand  
409 activity, as multifractal fluctuations at hand promoted multifractal fluctuations at the lower arm  
410 segments and reduced it in the upper arm segments. Multifractality in the global measure of  
411 CoP helped promote multifractal fluctuations at hand. The strength of these exchanges of  
412 multifractal fluctuations amongst degrees of freedom indexed the accuracy of perception.  
413 These results strengthen the view that nonlinear interactions entailed by the bodywide MFT  
414 support the flow of mechanical information supporting the coordination of perceptual  
415 judgments of object heaviness and length [30].

416 Collectively, our results offer a window into the bodywide synergy supporting dynamic  
417 touch by the hand. Multifractality-promoting effects of OBJD on the most distal parts of the  
418 arm became progressively smaller (from RFIN to RWRA to RFRM), and multifractality-  
419 diminishing effects of OBJD extend along with the proximal parts of the arm towards the  
420 shoulder (RELB, RUPA and RSHO). The joints thus played a mediating role between the  
421 upper arm and forearm; for instance, RELB showed a multifractality-limiting effect on OBJD  
422 and a multifractality-promoting effect on RWRA, RUPA and RSHO. And although RSHO  
423 showed increases in multifractality in conjunction with that of the rest of the upper arm, RSHO  
424 broke ranks with the upper arm and promoted later RWRA multifractality. Finally, increases in  
425 CoP multifractality precede subsequent increases in both RWRA and RFRM multifractality,  
426 situating local fluctuations at hand into a global context.

427 Our models of absolute error showed that perceptual accuracy in dynamic touch  
428 hinges on specific flow of multifractal fluctuations across the body. The strength of IRF effects  
429 served as significant predictors of the absolute error in judgments of both heaviness and  
430 length. Greater flow of multifractality across all pairs of anatomical locations did not always  
431 resulted in more accurate judgments, but the flow of multifractal fluctuations across specific  
432 body segments played a crucial role in perceiving accurately. Hence, we cannot claim the  
433 simple wholesale conclusion that more multifractality entails higher accuracy [27,28]. Instead,  
434 dynamic touch hinges upon specific interplay amongst many degrees of freedom, each

435 individually fluctuating multifractally—that is, with multiple fractal forms across time and  
436 fluctuation size—and the flow of these multifractal fluctuations may provide an essential  
437 medium for perceptual information [12,14].

438 Our findings strengthen the emerging view that a wider-than-neural set of tissues  
439 enable reflexes, that is, mechanotransduction of contextually-specific responses flowing  
440 faster than neural transmission. Crucially, the concept of “preflexes” appears to be more  
441 generic to bodywide coordination than specific to local anatomical structures [51–53]. Indeed,  
442 if the MFT is the architecture of life [54], then reflexes must be foundational to how life  
443 perceives and acts.

444

## 445 **5. Conclusion**

446 Our findings make a compelling case that the study of perception might not be  
447 exhausted by activity in the CNS. Instead, it must also include the flow of multifractal  
448 fluctuations across the bodywide MFT. Indeed, far from suggesting the latter to the exclusion  
449 of the former, it is incredibly likely that the CNS and MFT are mutually supporting systems  
450 [15]. The network relationships we have presented across the anatomical sleeves of the body  
451 show close resemblance to the resting state network (RSN) dynamics exhibited by the central  
452 nervous system (CNS) [55,56]. What RSN dynamics proposes for networks of neurons, we  
453 suggest the existence of synergies specific to perceptual intent (e.g., object heaviness vs.  
454 length vs. shape) in the flow of multifractality fluctuations in the network of anatomical nodes  
455 across the body.

456 Future research into the endogenous and exogenous factors affecting the bodywide  
457 flow of multifractal fluctuations might support diverse clinical applications. For instance, fractal  
458 fluctuations in exploratory movements predict differences in dynamic touch capabilities  
459 between children with typical and atypical (attention-deficit hyperactivity disorder and cerebral  
460 palsy) development [57,58]. Studying deficits in the flow of multifractality fluctuations  
461 longitudinally in typical- and atypical-development might provide insights into the chaotic basis  
462 of deficits in perceptual capabilities. Orthotic devices designed to accentuate the flow of  
463 fluctuations from distal to proximal body parts could help prevent falls in aging populations.  
464 Much like Priplata et al.’s [59,60] successful attempt at supporting posture in the elderly with  
465 fractally fluctuating vibrotactile stimulation to the foot sole in contact with the ground, the flow  
466 of multifractality fluctuations across the body could be altered to enhance coordination in  
467 suprapostural activities. Finally, building distal fluctuations into the architecture of  
468 perceptuomotor systems could foster adaptive, flexible chaotic control of robots [61] with  
469 dynamic touch capabilities. Our work thus begins to open what could be a broader research  
470 program in haptic perception and performance.

471 **References**

- 472 1. Goodman JM, Bensmaia SJ. 2018 The neural basis of haptic perception. In *Stevens'*  
473 *Handbook of Experimental Psychology and Cognitive Neuroscience*, pp. 201–239. John  
474 Wiley & Sons. (doi:10.1002/9781119170174.epcn205)
- 475 2. Macefield VG. 2005 Physiological characteristics of low-threshold mechanoreceptors in  
476 joints, muscle and skin in human subjects. *Clin. Exp. Pharmacol. Physiol.* **32**, 135–144.  
477 (doi:10.1111/j.1440-1681.2005.04143.x)
- 478 3. Gibson JJ. 1966 *The Senses Considered as Perceptual Systems*. Boston, MA:  
479 Houghton Mifflin.
- 480 4. Gibson JJ. 1979 *The Ecological Approach to Visual Perception*. Boston, MA: Houghton  
481 Mifflin.
- 482 5. Thomas BJ, Riley MA, Wagman JB. 2019 Information and its detection: The  
483 consequences of Gibson's theory of information pickup. In *Perception as Information*  
484 *Detection: Reflections on Gibson's Ecological Approach to Visual Perception* (eds JB  
485 Wagman, JJC Blau), pp. 237–252. New York, NY: Routledge.
- 486 6. Ingber DE. 2006 Cellular mechanotransduction: Putting all the pieces together again.  
487 *FASEB J.* **20**, 811–827. (doi:10.1096/fj.05-5424rev)
- 488 7. Ingber DE. 2010 From cellular mechanotransduction to biologically inspired  
489 engineering. *Ann. Biomed. Eng.* **38**, 1148–1161. (doi:10.1007/s10439-010-9946-0)
- 490 8. Kelty-Stephen DG. 2018 Multifractal evidence of nonlinear interactions stabilizing  
491 posture for phasmids in windy conditions: A reanalysis of insect postural-sway data.  
492 *PLoS One* **13**, e0202367. (doi:10.1371/journal.pone.0202367)
- 493 9. Ingber DE. 2008 Tensegrity-based mechanosensing from macro to micro. *Prog.*  
494 *Biophys. Mol. Biol.* **97**, 163–179. (doi:10.1016/j.pbiomolbio.2008.02.005)
- 495 10. Ingber DE. 2008 Tensegrity and mechanotransduction. *J. Bodyw. Mov. Ther.* **12**, 198–  
496 200. (doi:10.1016/j.jbmt.2008.04.038)
- 497 11. Chen CS, Ingber DE. 1999 Tensegrity and mechanoregulation: From skeleton to  
498 cytoskeleton. *Osteoarthr. Cartil.* **7**, 81–94. (doi:10.1053/joca.1998.0164)
- 499 12. Turvey MT. 2007 Action and perception at the level of synergies. *Hum. Mov. Sci.* **26**,  
500 657–697. (doi:10.1016/j.humov.2007.04.002)
- 501 13. Warren WH. 1990 The perception–action coupling. In *Sensory-Motor Organizations and*  
502 *Development in Infancy and Early Childhood* (eds B Bloch, BI Bertenthal), pp. 23–37.  
503 Dordrecht, Netherlands: Springer.

- 504 14. Profeta VLS, Turvey MT. 2018 Bernstein's levels of movement construction: A  
505 contemporary perspective. *Hum. Mov. Sci.* **57**, 111–133.  
506 (doi:10.1016/j.humov.2017.11.013)
- 507 15. Turvey MT, Fonseca ST. 2014 The medium of haptic perception: A tensegrity  
508 hypothesis. *J. Mot. Behav.* **46**, 143–187. (doi:10.1080/00222895.2013.798252)
- 509 16. Cabe PA. 2018 All perception engages the tensegrity-based haptic medium. *Ecol.*  
510 *Psychol.* , 1–13. (doi:10.1080/10407413.2018.1526037)
- 511 17. Chambliss AB, Khatau SB, Erdenberger N, Robinson DK, Hodzic D, Longmore GD,  
512 Wirtz D. 2013 The LINC-anchored actin cap connects the extracellular milieu to the  
513 nucleus for ultrafast mechanotransduction. *Sci. Rep.* **3**, 1087. (doi:10.1038/srep01087)
- 514 18. Jahed Z, Shams H, Mofrad MRK. 2015 A disulfide bond is required for the transmission  
515 of forces through SUN-KASH complexes. *Biophys. J.* **109**, 501–509.  
516 (doi:10.1016/j.bpj.2015.06.057)
- 517 19. Van Orden GC, Holden JG, Turvey MT. 2003 Self-organization of cognitive  
518 performance. *J. Exp. Psychol. Gen.* **132**, 331–350. (doi:10.1037/0096-3445.132.3.331)
- 519 20. Kello CT. 2013 Critical branching neural networks. *Psychol. Rev.* **120**, 230–254.  
520 (doi:10.1037/a0030970)
- 521 21. Donohue SE, Woldorff MG, Mitroff SR. 2010 Video game players show more precise  
522 multisensory temporal processing abilities. *Attention, Perception, Psychophys.* **72**,  
523 1120–1129. (doi:10.3758/APP.72.4.1120)
- 524 22. Mangalam M, Connors JD, Kelty-Stephen DG, Singh T. 2019 Fractal fluctuations in  
525 muscular activity contribute to judgments of length but not heaviness via dynamic touch.  
526 *Exp. Brain Res.* **237**, 1213–1216. (doi:10.1007/s00221-019-05505-2)
- 527 23. Palatinus Z, Dixon JA, Kelty-Stephen DG. 2013 Fractal fluctuations in quiet standing  
528 predict the use of mechanical information for haptic perception. *Ann. Biomed. Eng.* **41**,  
529 1625–1634. (doi:10.1007/s10439-012-0706-1)
- 530 24. Palatinus Z, Kelty-Stephen DG, Kinsella-Shaw J, Carello C, Turvey MT. 2014 Haptic  
531 perceptual intent in quiet standing affects multifractal scaling of postural fluctuations. *J.*  
532 *Exp. Psychol. Hum. Percept. Perform.* **40**, 1808–1818. (doi:10.1037/a0037247)
- 533 25. Stephen DG, Hajnal A. 2011 Transfer of calibration between hand and foot: Functional  
534 equivalence and fractal fluctuations. *Attention, Perception, Psychophys.* **73**, 1302–  
535 1328. (doi:10.3758/s13414-011-0142-6)
- 536 26. Kelty-Stephen DG, Dixon JA. 2014 Interwoven fluctuations during intermodal  
537 perception: Fractality in head sway supports the use of visual feedback in haptic  
538 perceptual judgments by manual wielding. *J. Exp. Psychol. Hum. Percept. Perform.* **40**,  
539 2289–2309. (doi:10.1037/a0038159)

- 540 27. Mangalam M, Chen R, McHugh TR, Singh T, Kelty-Stephen DG. 2020 Bodywide  
541 fluctuations support manual exploration: Fractal fluctuations in posture predict  
542 perception of heaviness and length via effortful touch by the hand. *Hum. Mov. Sci.* **69**,  
543 102543. (doi:10.1016/j.humov.2019.102543)
- 544 28. Mangalam M, Kelty-Stephen DG. 2020 Multiplicative-cascade dynamics supports  
545 whole-body coordination for perception via effortful touch. *Hum. Mov. Sci.* **70**, 102595.  
546 (doi:10.1016/j.humov.2020.102595)
- 547 29. Stephen DG, Arzamarski R, Michaels CF. 2010 The role of fractality in perceptual  
548 learning: Exploration in dynamic touch. *J. Exp. Psychol. Hum. Percept. Perform.* **36**,  
549 1161–1173. (doi:10.1037/a0019219)
- 550 30. Mangalam M, Carver NS, Kelty-Stephen DG. 2020 Global broadcasting of local fractal  
551 fluctuations in a bodywide distributed system supports perception via effortful touch.  
552 *Chaos, Solitons & Fractals* **135**, 109740. (doi:10.1016/j.chaos.2020.109740)
- 553 31. Kilian L, Lütkepohl H. 2017 *Structural vector autoregressive analysis*. Cambridge, UK:  
554 Cambridge University Press.
- 555 32. Bell C, Carver N, Zbaracki J, Kelty-Stephen D. 2019 Nonlinear amplification of  
556 variability through interaction across scales supports greater accuracy in manual  
557 aiming: Evidence from a multifractal analysis with comparisons to linear surrogates in  
558 the Fitts task. *Front. Physiol.* (doi:10.3389/fphys.2019.00998)
- 559 33. Carver NS, Bojovic D, Kelty-Stephen DG. 2017 Multifractal foundations of visually-  
560 guided aiming and adaptation to prismatic perturbation. *Hum. Mov. Sci.* **55**, 61–72.  
561 (doi:10.1016/j.humov.2017.07.005)
- 562 34. Kelty-Stephen DG. 2017 Threading a multifractal social psychology through within-  
563 organism coordination to within-group interactions: A tale of coordination in three acts.  
564 *Chaos, Solitons & Fractals* **104**, 363–370. (doi:10.1016/j.chaos.2017.08.037)
- 565 35. Kelty-Stephen DG, Wallot S. 2017 Multifractality versus (mono-) fractality as evidence  
566 of nonlinear interactions across timescales: Disentangling the belief in nonlinearity from  
567 the diagnosis of nonlinearity in empirical data. *Ecol. Psychol.* **29**, 259–299.  
568 (doi:10.1080/10407413.2017.1368355)
- 569 36. Oldfield RC. 1971 The assessment and analysis of handedness: The Edinburgh  
570 inventory. *Neuropsychologia* **9**, 97–113. (doi:10.1016/0028-3932(71)90067-4)
- 571 37. Chhabra A, Jensen R V. 1989 Direct determination of the  $f(\alpha)$  singularity spectrum.  
572 *Phys. Rev. Lett.* **62**, 1327–1330. (doi:10.1103/PhysRevLett.62.1327)
- 573 38. Mandelbrot BB. 1982 *The Fractal Geometry of Nature*. New York, NY: W H Freeman.
- 574 39. Mandelbrot BB. 1997 *Fractals and Scaling in Finance*. New York, NY: Springer.

- 575 40. Halsey TC, Jensen MH, Kadanoff LP, Procaccia I, Shraiman BI. 1986 Fractal measures  
576 and their singularities: The characterization of strange sets. *Phys. Rev. A* **33**, 1141–  
577 1151. (doi:10.1103/PhysRevA.33.1141)
- 578 41. Kelty-Stephen DG, Palatinus K, Saltzman E, Dixon JA. 2013 A tutorial on multifractality,  
579 cascades, and interactivity for empirical time series in ecological science. *Ecol.*  
580 *Psychol.* **25**, 1–62. (doi:10.1080/10407413.2013.753804)
- 581 42. Veneziano D, Moglen GE, Bras RL. 1995 Multifractal analysis: Pitfalls of standard  
582 procedures and alternatives. *Phys. Rev. E* **52**, 1387–1398.  
583 (doi:10.1103/PhysRevE.52.1387)
- 584 43. Ihlen EAF, Vereijken B. 2010 Interaction-dominant dynamics in human cognition:  
585 Beyond  $1/f$  fluctuation. *J. Exp. Psychol. Gen.* **139**, 436–463. (doi:10.1037/a0019098)
- 586 44. Schreiber T, Schmitz A. 1996 Improved surrogate data for nonlinearity tests. *Phys. Rev.*  
587 *Lett.* **77**, 635–638. (doi:10.1103/PhysRevLett.77.635)
- 588 45. Sims CA. 1980 Macroeconomics and reality. *Econometrica* **48**, 1–48.  
589 (doi:10.2307/1912017)
- 590 46. Lutkepohl H. 2007 *New Introduction to Multiple Time Series Analysis*. New York, NY:  
591 Springer.
- 592 47. Hatemi-J A. 2004 Multivariate tests for autocorrelation in the stable and unstable VAR  
593 models. *Econ. Model.* **21**, 661–683.
- 594 48. Singer JD, Willett JB. 2003 *Applied Longitudinal Analysis: Modeling Change and Event*  
595 *Occurrence*. New York, NY: Oxford University Press.
- 596 49. Pinheiro J, Bates D, DebRoy S, Sarkar D, Team RC. 2018 nlme: Linear and nonlinear  
597 mixed effects models. *R Packag. version 3.1-137*
- 598 50. Bates D, Sarkar D, Bates M, Matrix L. 2007 The lme4 package.
- 599 51. Svidersky VL, Plotnikova SI. 2002 Insects and vertebrates: Analogous structures in  
600 higher integrative centers of the brain. *J. Evol. Biochem. Physiol.* **38**, 627–639.  
601 (doi:10.1023/A:1022073218825)
- 602 52. Dilão R, Hauser MJB. 2013 Chemotaxis with directional sensing during *Dictyostelium*  
603 aggregation. *C. R. Biol.* **336**, 565–571. (doi:10.1016/j.crv.2013.10.008)
- 604 53. Hengstenberg R. 1993 Multisensory control in insect oculomotor systems. In *Visual*  
605 *Motion and its Role in the Stabilization of Gaze* (eds FA Miles, J Wallman), pp. 285–  
606 298. New York, NY: Elsevier.
- 607 54. Ingber DE. 1998 The architecture of life. *Sci. Am.* **278**, 48–57.



- 608 55. Deco G, Corbetta M. 2010 The dynamical balance of the brain at rest. *Neurosci.* **17**,  
609 107–123. (doi:10.1177/1073858409354384)
- 610 56. Deco G, Jirsa VK, McIntosh AR. 2011 Emerging concepts for the dynamical  
611 organization of resting-state activity in the brain. *Nat. Rev. Neurosci.* **12**, 43–56.  
612 (doi:10.1038/nrn2961)
- 613 57. Avelar BS, Mancini MC, Fonseca ST, Kelty-Stephen DG, de Miranda DM, Romano-  
614 Silva MA, de Araújo PA, Silva PL. 2019 Fractal fluctuations in exploratory movements  
615 predict differences in dynamic touch capabilities between children with Attention-Deficit  
616 Hyperactivity Disorder and typical development. *PLoS One* **14**, e0217200. (doi:10.1371/  
617 journal.pone.0217200)
- 618 58. Ocarino JM, Fonseca ST, Silva PLP, Gonçalves GGP, Souza TR, Mancini MC. 2014  
619 Dynamic touch is affected in children with cerebral palsy. *Hum. Mov. Sci.* **33**, 85–96.  
620 (doi:10.1016/j.humov.2013.08.007)
- 621 59. Priplata A, Niemi J, Salen M, Harry J, Lipsitz LA, Collins JJ. 2002 Noise-enhanced  
622 human balance control. *Phys. Rev. Lett.* **89**, 238101.  
623 (doi:10.1103/PhysRevLett.89.238101)
- 624 60. Priplata AA, Niemi JB, Harry JD, Lipsitz LA, Collins JJ. 2003 Vibrating insoles and  
625 balance control in elderly people. *Lancet* **362**, 1123–1124. (doi:10.1016/S0140-  
626 6736(03)14470-4)
- 627 61. Steingrube S, Timme M, Wörgötter F, Manoonpong P. 2010 Self-organized adaptation  
628 of a simple neural circuit enables complex robot behaviour. *Nat. Phys.* **6**, 224–230.  
629 (doi:10.1038/nphys1508)

630 **Table 1.** Experimental objects.

| Object | Dowel           | Attached rings |             |          |          | Object parameters |                      |                                                           |                                                 |
|--------|-----------------|----------------|-------------|----------|----------|-------------------|----------------------|-----------------------------------------------------------|-------------------------------------------------|
|        |                 | Composition    | Length [cm] | Mass [g] | Mass [g] | Location [cm]     | Mass, $m$ [g]        | Static moment, $M^a$ [g·cm <sup>2</sup> /s <sup>2</sup> ] | Moment of inertia, $I_1^b$ [g·cm <sup>2</sup> ] |
| 1      | Oak wood        | 75             | 68          | 56       | 60       | 156               | 5,791,800 ( $M_S$ )  | 278,850                                                   | 900                                             |
| 2      | Oak wood        | 75             | 68          | 168      | 20       | 236               | 5,791,800 ( $M_S$ )  | 153,500                                                   | 3,220                                           |
| 3      | Hollow aluminum | 75             | 109         | 56       | 60       | 165               | 7,298,550 ( $M_M$ )  | 321,770                                                   | 660                                             |
| 4      | Hollow aluminum | 75             | 109         | 168      | 20       | 277               | 7,298,550 ( $M_M$ )  | 194,720                                                   | 1,190                                           |
| 5      | Solid aluminum  | 75             | 266         | 56       | 60       | 332               | 13,068,300 ( $M_L$ ) | 586,720                                                   | 3,110                                           |
| 6      | Solid aluminum  | 75             | 266         | 168      | 20       | 434               | 13,068,300 ( $M_L$ ) | 459,850                                                   | 5,850                                           |

631 <sup>a</sup>We determined the static moment for each object assuming that it was aligned horizontally (i.e., parallel to the ground)  
 632 and grasped about its proximal end.

633 <sup>b</sup>We calculated the values of a 3×3 inertia tensor matrix for each object, each value corresponding to rotations about the wrist,  
 634 assuming 5-cm distance between the location of grasp and the object's proximal end. Diagonalizing the 3×3 inertia tensor  
 635 matrix using MATLAB function "eig (A)" yielded the eigenvalues of the tensor.

636 **Table 2.** Location of the reflective markers attached to each experimental object and the  
637 participant's body.

| <b>Marker Location</b> |      |                                                          |
|------------------------|------|----------------------------------------------------------|
| Experimental object    | OBJP | tip of the object                                        |
|                        | OBJD | 30 cm from the distal end                                |
|                        | OBJP | 30 cm from the proximal end                              |
| Participant's body     | RFIN | just below the middle knuckle on the right hand          |
|                        | RWRA | extended from the thumb side using a wrist bar           |
|                        | RWRB | extended from the little finger side using a wrist bar   |
|                        | RFRM | on the outside of the lower arm                          |
|                        | RELB | on the bony prominence on the outside of the elbow joint |
|                        | RUPA | outside of the upper arm                                 |
|                        | RSHO | on the bony prominence on top of the right shoulder      |
|                        | CLAV | top of the breast bone                                   |
|                        | STRN | base of the breast bone                                  |

638 **Table 3.** Coefficients of GLM and LME models examining the effects of CoP multifractality and significant impulse-response  
 639 relationships on the absolute error in perceived heaviness,  $H_{\text{error}}$ , and perceived length,  $L_{\text{error}}$ , respectively.

| Effects                        | $H_{\text{error}}^a$ |        |         | $L_{\text{error}}^b$ |        |         |
|--------------------------------|----------------------|--------|---------|----------------------|--------|---------|
|                                | $b \pm s.e.m.^c$     | $z$    | $p^d$   | $b \pm s.e.m.^c$     | $t$    | $p^d$   |
| (Intercept)                    | 4.59±0.11            | 39.99  | < 0.001 | 134.38±6.28          | 21.41  | < 0.001 |
| Wrist angle (Radial – Neutral) | 0.039±0.0099         | 3.92   | < 0.001 | -0.28±0.48           | -0.59  | 0.552   |
| Wrist angle (Ulnar – Neutral)  | -0.13±0.010          | -12.67 | < 0.001 | 1.80±0.47            | 3.83   | < 0.001 |
| Log $l_1$                      | -0.60±0.020          | -29.62 | < 0.001 | -17.58±0.95          | -18.47 | < 0.001 |
| Log $l_3$                      | 0.69±0.013           | 52.63  | < 0.001 |                      |        |         |
| Trial order                    |                      |        |         | 0.019±0.0062         | 3.01   | 0.003   |
| CoP $_{\Delta\alpha}$          | 0.59±0.14            | 4.34   | < 0.001 |                      |        |         |
| OBJD->RFIN                     | 10.54±1.99           | 5.30   | < 0.001 |                      |        |         |
| OBJD->RELB                     | -10.07±3.65          | -2.76  | 0.006   |                      |        |         |
| OBJD->RUPA                     | 12.56±3.68           | 3.42   | < 0.001 | 634.85±262.92        | 2.41   | 0.047   |
| RWRA->RELB                     |                      |        |         | 372.31±156.11        | 2.38   | 0.049   |
| RFIN->RUPA                     | 20.75±6.42           | 3.23   | 0.001   |                      |        |         |
| RELB->RWRA                     |                      |        |         | -973.84±262.91       | -3.70  | 0.008   |
| RELB->RUPA                     | 15.36±5.62           | 2.73   | 0.006   | 5299.79±1023.95      | 5.18   | 0.001   |
| RELB->RSHO                     |                      |        |         | -8205.37±1338.61     | -6.13  | < 0.001 |
| RUPA->CLAV                     | 10.10±4.61           | 2.19   | 0.028   | -694.50±174.47       | -3.98  | 0.005   |
| CoP->RWRA                      | -51.54±11.51         | -4.48  | < 0.001 |                      |        |         |
| RFRM->CoP                      |                      |        |         | 479.31±147.32        | 3.25   | 0.008   |

640 <sup>a</sup>Fitted model: absolute( $H_{\text{error}}$ ) ~ Wrist angle + Log $l_1$  + Log $l_3$  + CoP $_{\Delta\alpha}$  + (OBJD->RFIN + OBJD->RELB + OBJD->RUPA + RFIN-  
 641 >RUPA + RELB->RUPA + RUPA->CLAV + CoP->RWRA) + (1|Participant).

642 <sup>b</sup>Fitted model: absolute( $L_{\text{error}}$ ) ~ Wrist angle + Log $l_1$  + Trial order + (OBJD->RUPA + RWRA->RELB + RELB->RWRA + RELB-  
 643 >RUPA + RELB->RSHO + RUPA->CLAV + RFRM->CoP) + (1|Participant).

644 <sup>c</sup>95% confidence intervals are calculable as  $b \pm 1.96s.e.m.$

645 <sup>a</sup>Boldfaced values indicate statistical significance at the two-tailed alpha level of 0.05.

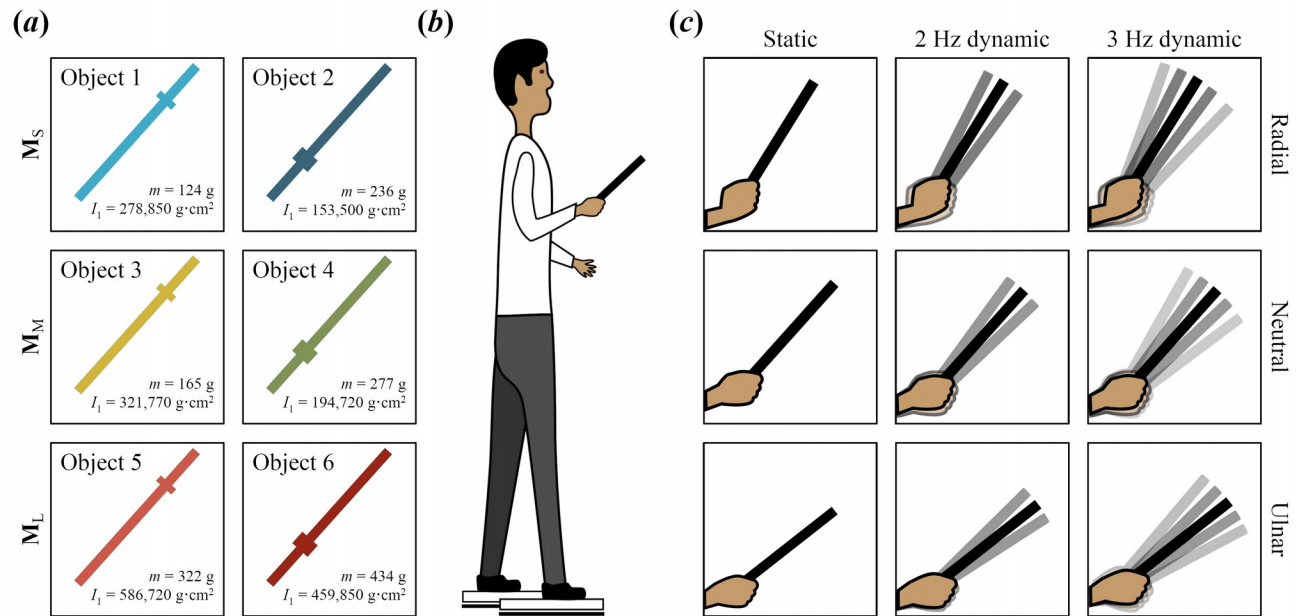

646 **Figure 1.** Schematic illustration of the experimental objects, setup, and exploratory  
647 conditions. (a) Each participant wielded six objects with different mass,  $m$ , static moment,  $M$ ,  
648 and the moment of inertia,  $I_1$ . (b) Each participant stood with his/her two feet on separate  
649 force plates, wielded each object for 5 s, and reported his/her judgments of heaviness and  
650 length of that object. (c) Different conditions of wrist angle and wrist angular kinematics.

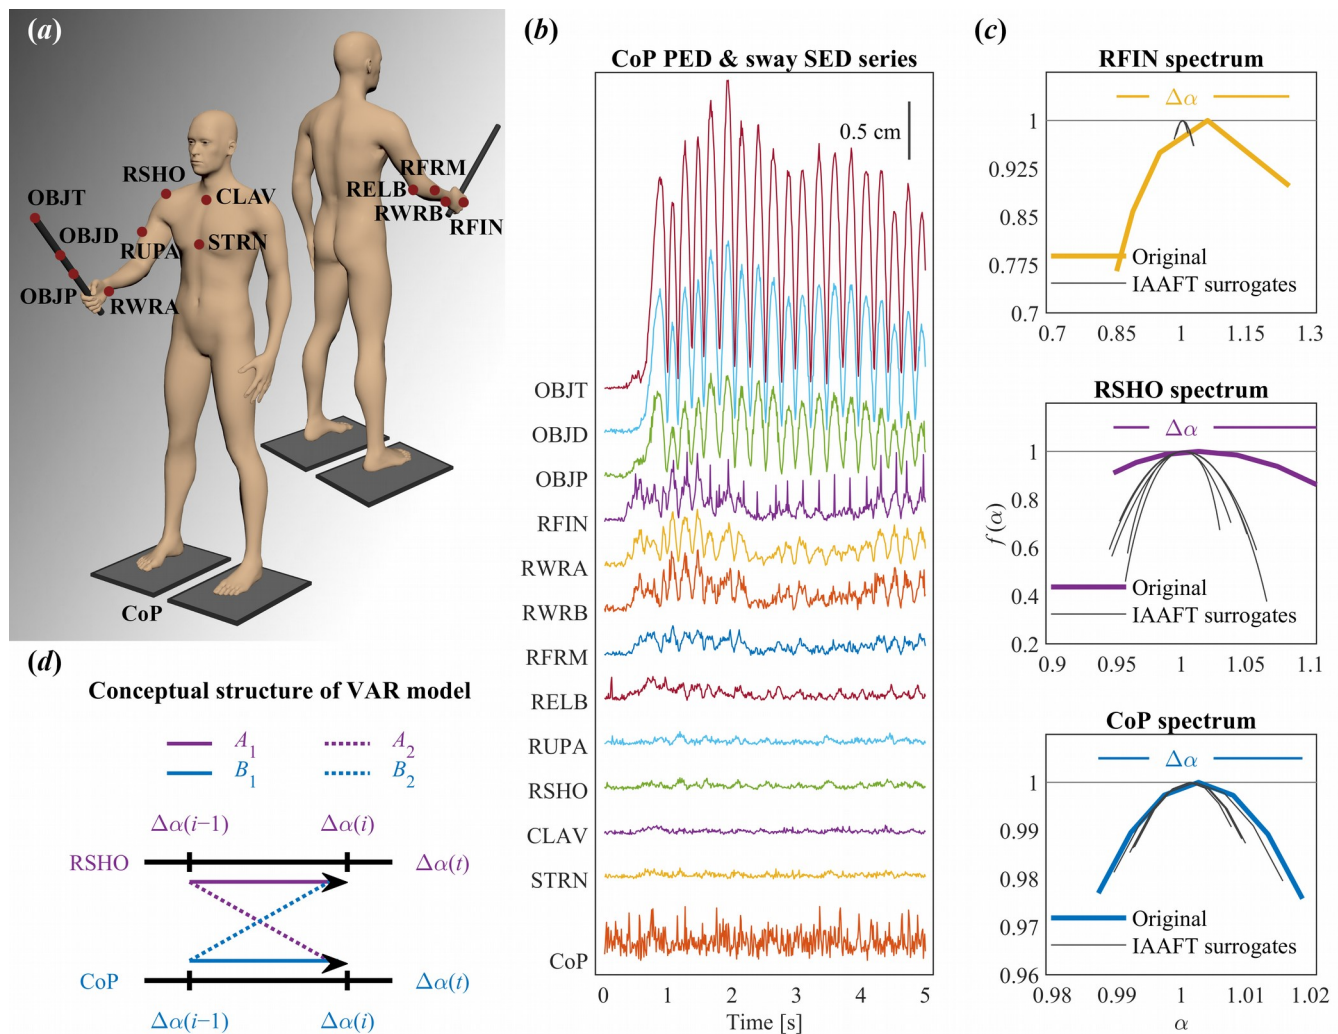

651 **Figure 2.** Overview of data acquisition process and analysis. (a) Locations of the reflective  
 652 markers attached to the experimental object and the participant's body. (b) CoP PED and  
 653 sway SED series for a representative trial (Condition: Neutral, 2 Hz dynamic, Object 6). (c)  
 654 Singularity spectrums ( $\alpha$ ,  $f(\alpha)$ ) of a representative original CoP PED series and two sway SED  
 655 series (colored lines), as well as those of their five IAAFT surrogates (gray lines). (d) The  
 656 conceptual structure of the VAR analysis used to model the diffusion of multifractality across  
 657 different anatomical locations. The contribution of each location is represented as a series of  
 658 trial-by-trial values of the singularity spectrum width ( $\Delta\alpha = \alpha_{max} - \alpha_{min}$ ). Arrows represent  
 659 weights in the model, indicating the effects of  $\Delta\alpha$  in the previous trail on  $\Delta\alpha$  in the current  
 660 trial.

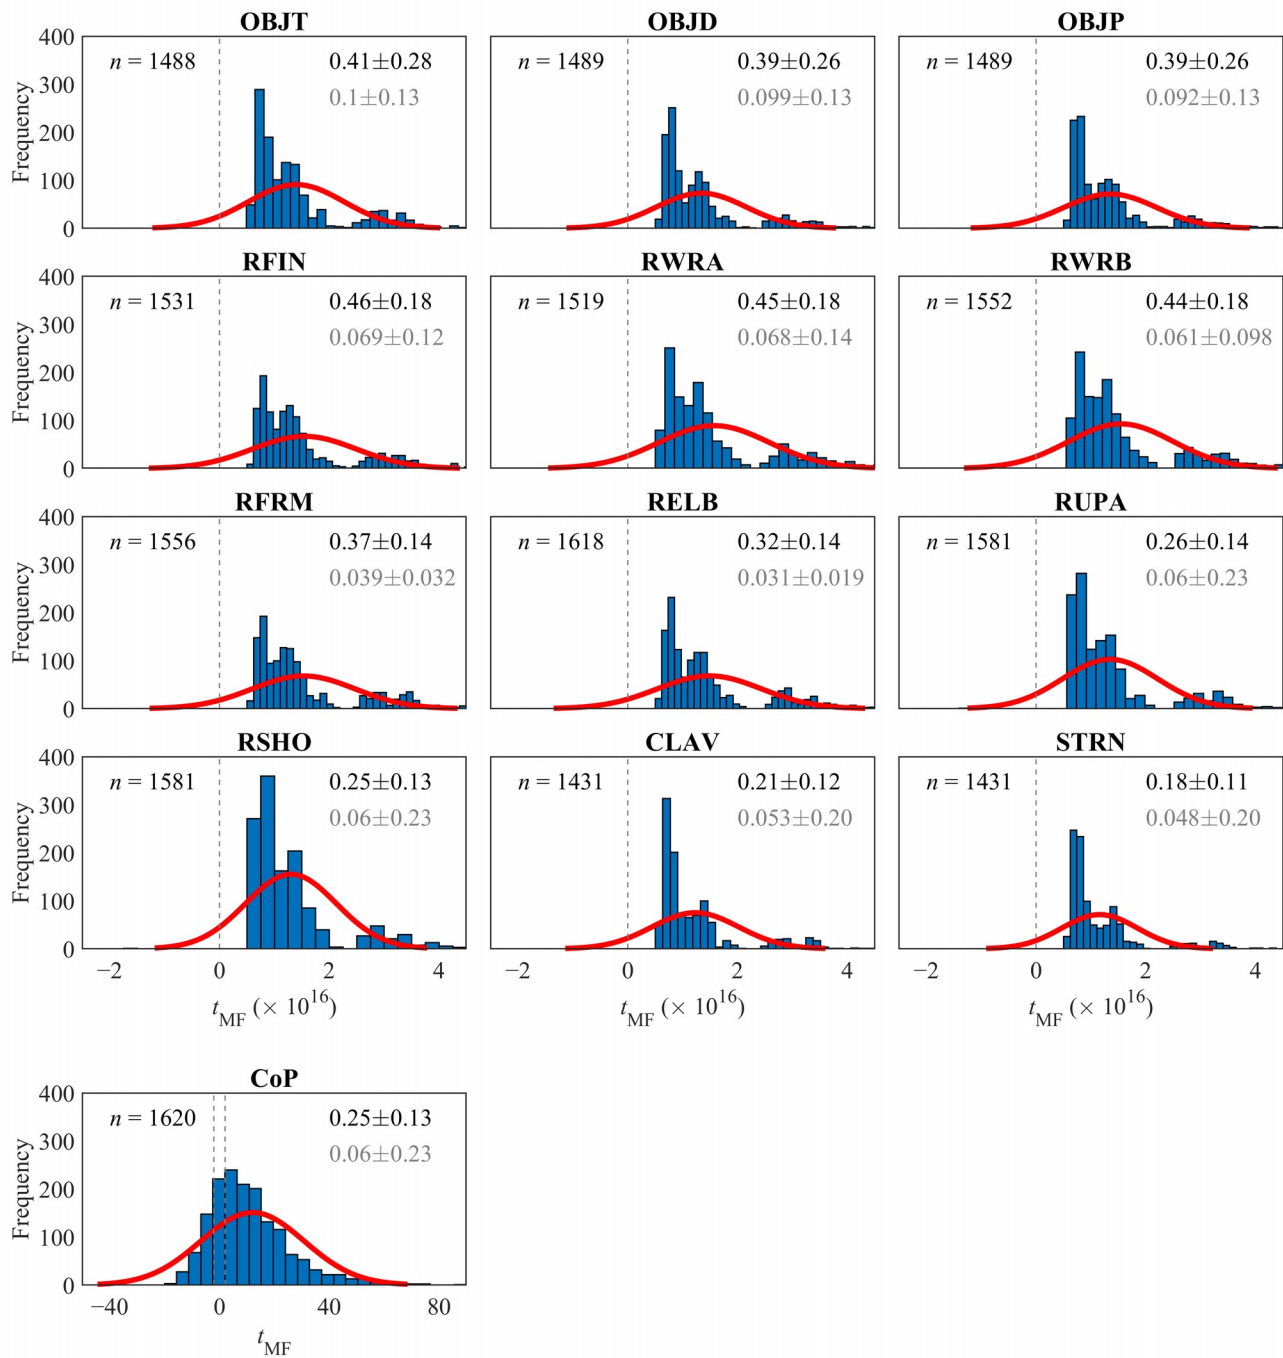

661 **Figure 3.** Frequency distributions of  $t_{MF}$  comparing the singularity spectrum widths (  
662  $\Delta\alpha = \alpha_{max} - \alpha_{min}$ ) of the original CoP PED and sway SED series and that of their 32 IAAFT  
663 surrogates. The values on the top right in black and gray in each plot describe  $mean \pm s.d.$   
664 values of  $\Delta\alpha$  for the original version and 32 IAAFT surrogates of the recorded CoP PED and  
665 sway SED series the number of which is indicated on the top left.  $t_{TM} > 0$  indicates that the  
666 original spectrum was wider than the surrogate spectrums and vice versa. The dashed  
667 vertical lines indicate the cutoffs for statistical significance at the two-tailed alpha level of 0.05  
668 for 31 DoFs. Most (1412/1620) CoP PED and all sway SED series showed multifractality.



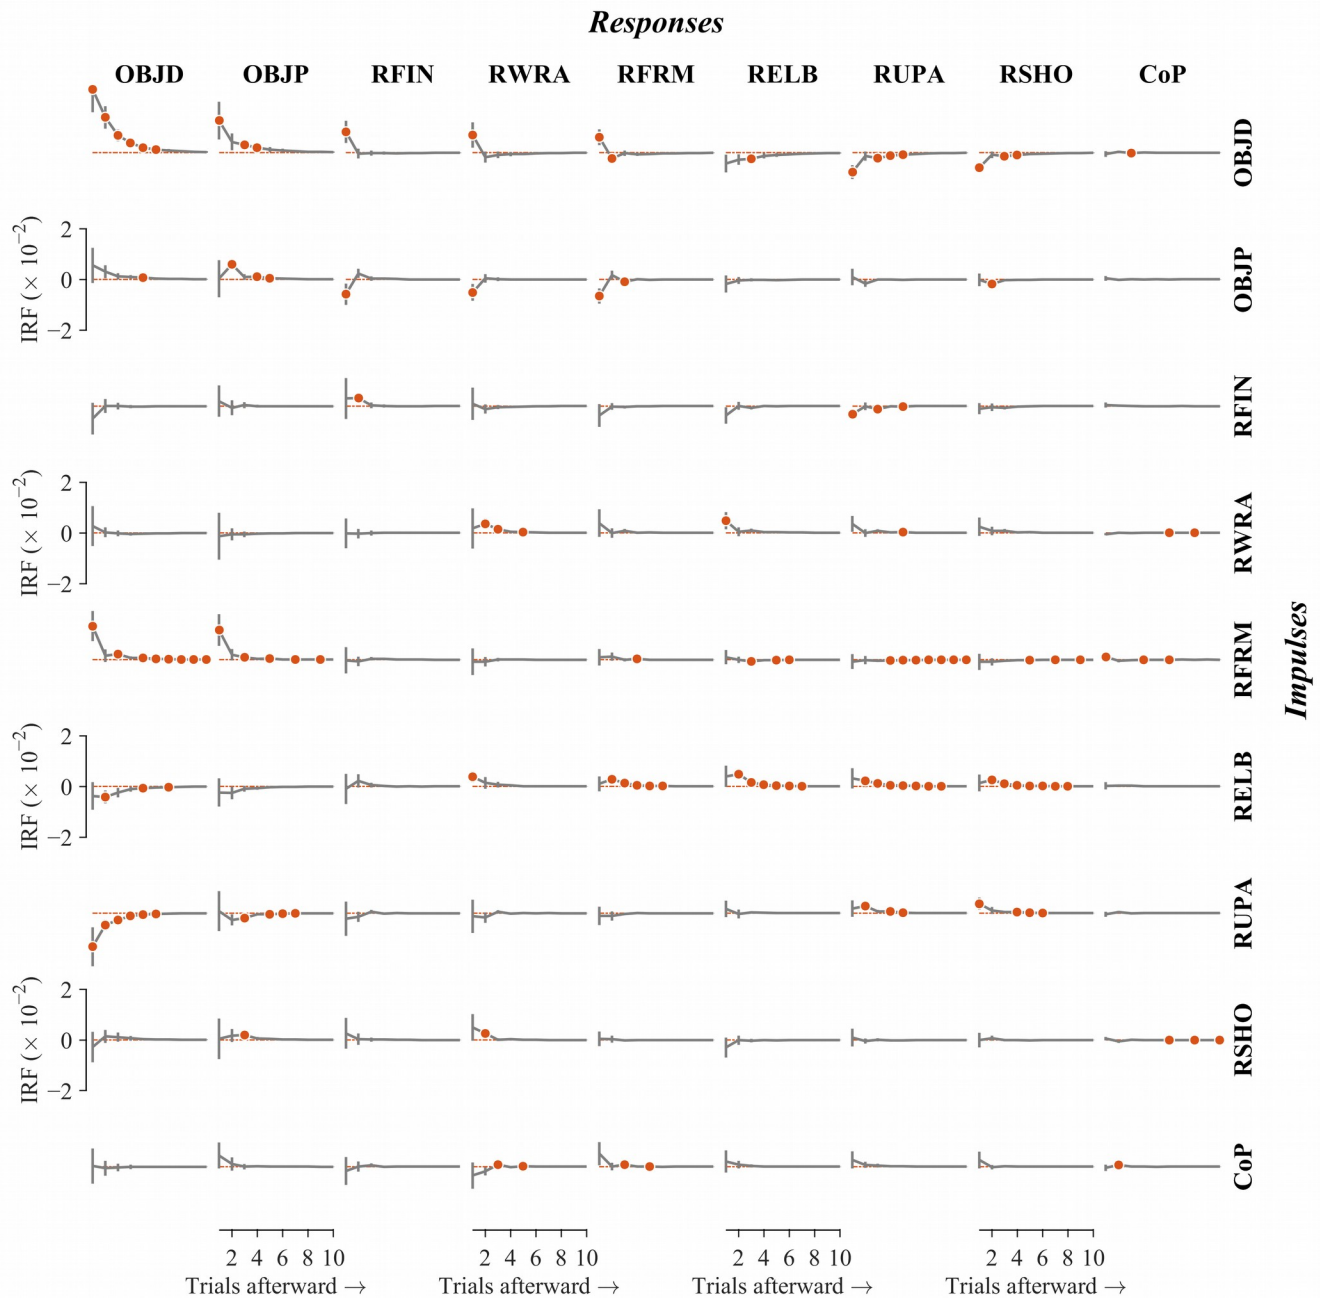

669 **Figure 4.** Mean  $\pm$  s.e.m. ( $n = 15$  participants) responses in  $\Delta\alpha$  of CoP PED and sway SED  
 670 series over ten trials afterward to an impulse in  $\Delta\alpha$  of each other series in the current trial.  
 671 Each black curve illustrates the later response as it decays over subsequent trials, and each  
 672 solid red circle indicates a significant ( $p < 0.01$ ) response to an impulse in  $i^{\text{th}}$  trial afterward (1  
 673 through 10). The strongest effects included multifractality-promoting effects from the object  
 674 (OBJD) on the most distal arm segments that become progressively smaller (from RFIN to  
 675 RWRA to RFRM) and then multifractality-diminishing effects on the proximal arm segments  
 676 (RELB, RUPA and RSHO); see text for all other significant impulse-response effects.

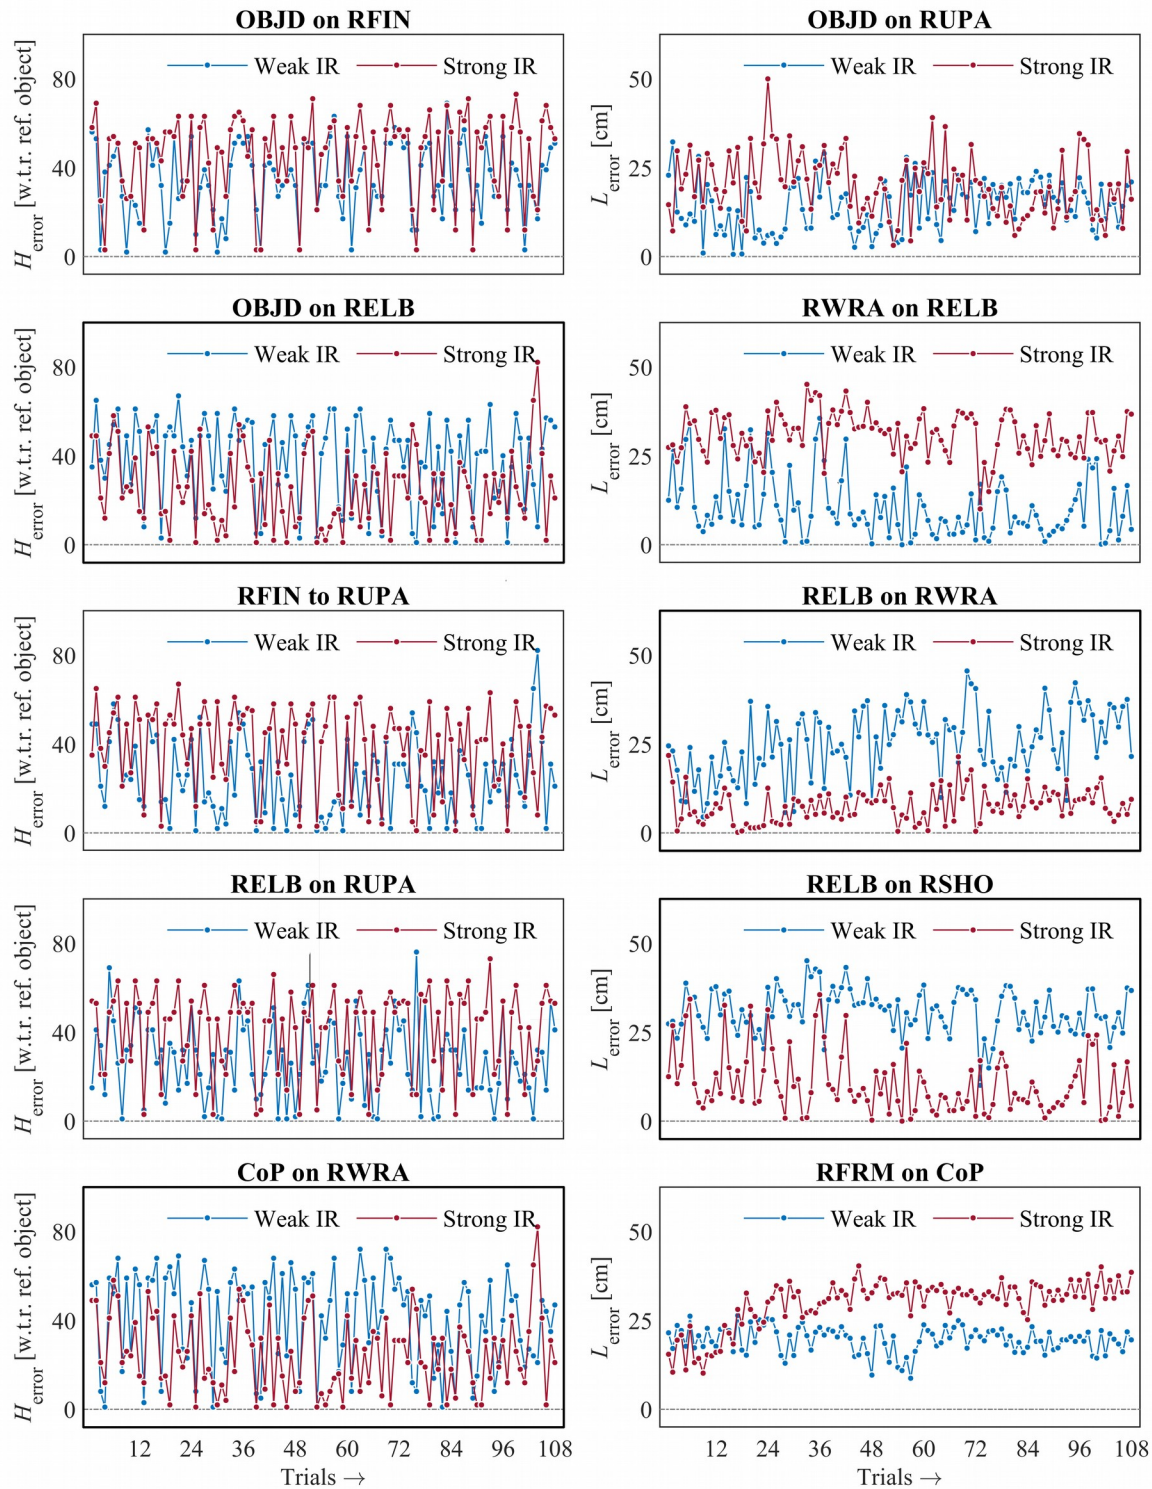

677 **Figure 5.** Comparisons of absolute errors in perceived heaviness,  $H_{\text{error}}$ , and perceived length,  
678  $L_{\text{error}}$ , for representative participants with weak and strong impulse-response (IR) effects for  
679 selected pairwise relationships. The strong IR effects of OBDJ on RELB and CoP on RWRA  
680 entailed decrease in  $H_{\text{error}}$  (left panels in bold); all other IR effects entailed increases in  $H_{\text{error}}$   
681 (left panels). The strong IR effects of RELB on RWRA and RELB on RSHO entailed decrease  
682 in  $L_{\text{error}}$  (right panels in bold); all other IR effects entailed increases in  $L_{\text{error}}$  (right panels).
